# Supplementary material
Source: Research Square preprint supplement (doi:10.21203/rs.3.rs-9638877/v1)
Supplement: Supplementary file 1 [file 3b6d249000afa67837bfbff1.docx]

Table 3 Systematic evaluation or meta-analysis evaluation results

| Included literature | 1 | 2 | 3 | 4 | 5 | 6 | 7 | 8 | 9 | 10 | 11 | 12 | 13 | 14 | 15 | 16 |
| --- | --- | --- | --- | --- | --- | --- | --- | --- | --- | --- | --- | --- | --- | --- | --- | --- |
| Piri Damaghi et al.​​ (41) | Conformant | Non-conformant | Conformant | Partially Conformant | Conformant | Conformant | Non-conformant | Conformant | Partially Conformant | Conformant | Conformant | Non-conformant | Conformant | Conformant | Non-conformant | Conformant |
| Zhou et al.​​ (42) | Conformant | Partially Conformant | Conformant | Conformant | Conformant | Conformant | Conformant | Conformant | Conformant | Conformant | Conformant | Conformant | Conformant | Conformant | Conformant | Conformant |
| Thomson et al.​​ (43) | Conformant | Conformant | Conformant | Conformant | Conformant | Conformant | Conformant | Conformant | Conformant | Conformant | Partially Conformant | Conformant | Conformant | Conformant | Conformant | Conformant |
| Prado et al.​​ (44) | Conformant | Non-conformant | Partially Conformant | Conformant | Conformant | Partially Conformant | Non-conformant | Conformant | Conformant | Partially Conformant | Conformant | Non-conformant | Conformant | Conformant | Non-conformant | Conformant |
| Sa-Nguansai et al. ​​(45) | Conformant | Conformant | Conformant | Conformant | Conformant | Conformant | Conformant | Conformant | Conformant | Conformant | Conformant | Conformant | Conformant | Conformant | Conformant | Conformant |
| Seid et al.​​ (46) | Conformant | Partially Conformant | Conformant | Conformant | Conformant | Conformant | Conformant | Conformant | Conformant | Conformant | Conformant | Conformant | Conformant | Conformant | Conformant | Conformant |
| Trujillo et al.​​ (47) | Conformant | Conformant | Conformant | Conformant | Conformant | Conformant | Conformant | Conformant | Conformant | Conformant | Conformant | Conformant | Conformant | Conformant | Conformant | Conformant |
| Liu et al. ​​(48) | Conformant | Partially Conformant | Conformant | Conformant | Conformant | Conformant | Conformant | Conformant | Conformant | Conformant | Conformant | Conformant | Conformant | Conformant | Conformant | Conformant |
| Vella et al. ​​(49) | Conformant | Partially Conformant | Conformant | Conformant | Conformant | Conformant | Conformant | Conformant | Conformant | Conformant | Conformant | Conformant | Conformant | Conformant | Conformant | Conformant |
| Choi et al.​​ (50) | Conformant | Conformant | Conformant | Conformant | Conformant | Conformant | Conformant | Conformant | Conformant | Conformant | Conformant | Conformant | Conformant | Conformant | Conformant | Conformant |
| Kang et al. ​​(51) | Conformant | Conformant | Conformant | Conformant | Conformant | Conformant | Conformant | Conformant | Conformant | Conformant | Conformant | Conformant | Conformant | Conformant | Conformant | Conformant |
| Jang et al.​​ (52) | Conformant | Partially Conformant | Conformant | Conformant | Conformant | Conformant | Conformant | Conformant | Conformant | Conformant | Conformant | Conformant | Conformant | Conformant | Conformant | Conformant |

*Note:*1：Did the research questions and inclusion criteria include the components of PICO? 2：Was there a protocol established before conducting the review? If revised, were amendments reported in detail? 3：Was the selection of study designs justified? 4：Was a comprehensive literature search strategy used? 5：Was study selection performed in duplicate? 6：Was data extraction performed in duplicate? 7：Was a list of excluded studies provided with justifications? 8：Were the characteristics of included studies adequately described? 9：Was the risk of bias assessed using appropriate tools? 10：Did the report include funding sources of primary studies? 11：If meta-analysis was performed, were statistical methods appropriate? 12：If meta-analysis was performed, was the impact of individual study RoB on results examined? 13：When interpreting results, was consideration given to RoB in primary studies? 14：Was heterogeneity satisfactorily discussed? 15：If quantitative synthesis was done, was publication bias investigated? 16：Were conflicts of interest and funding sources declared?
