# Supplementary material
Source: Research Square preprint supplement (doi:10.21203/rs.3.rs-9638877/v1)
Supplement: Supplementary file 2 [file 6ecaca2948e80b82c6ac2d10.docx]

**Supplementary Material. PubMed search strategy**

#1 ("gastric cancer"[Title/Abstract] OR "stomach neoplasms"[MeSH Terms] OR "gastric carcinoma"[Title/Abstract] OR "stomach cancer"[Title/Abstract])

#2 ("malnutrition-sarcopenia syndrome"[Title/Abstract] OR "sarcopenia"[MeSH Terms] OR "muscle atrophy"[Title/Abstract] OR "muscle wasting"[Title/Abstract] OR "cachexia"[Title/Abstract])

#3 ("oral nutritional supplements"[Title/Abstract] OR "ONS"[Title/Abstract] OR "dietary supplements"[MeSH Terms] OR "enteral nutrition"[MeSH Terms] OR "high-protein nutrition"[Title/Abstract])

#4 ("resistance exercise"[Title/Abstract] OR "resistance training"[MeSH Terms] OR "strength training"[Title/Abstract] OR "progressive resistance"[Title/Abstract] OR "weight training"[Title/Abstract])

#5 ("randomized controlled trial"[Publication Type] OR "systematic review"[Publication Type] OR "meta-analysis"[Publication Type] OR "clinical trial"[Publication Type] OR "guideline"[Publication Type])

#6 #1 AND #2 AND #3 AND #4

#7 #6 AND #5
